# Supplementary material
Source: PubMed Central journal article supplement (PMC2900200)
Supplement: NIHMS86467-supplement-1_si_001.pdf [file NIHMS86467-supplement-1_si_001.pdf]

Supplementary information for:

The predicted binding site and dynamics of peptide antagonists to the  
Methuselah GPCR from *Drosophila melanogaster*

Jiyoung Heo, William W. Ja, Seymour Benzer and William A. Goddard III

**Contents**

**Table S1** Kinetics analysis of peptide binding by surface plasmon resonance.

**Figure S1** Binding of LR2 ligand into the Mth ectodomain.

**Figure S2** Changes during 2 ns MD simulation of key intermolecular interactions in mutant complexes.

**Figure S3** Binding interactions of LP1 wild-type (WT) and mutant peptides with the Mth ectodomain.

**Table S1** Kinetics analysis of peptide binding by surface plasmon resonance. Rate constants are given as averages ( $\pm$  s.d.) where more than one independent sensor chip surface was used.  $K_D$  is calculated from the on and off rates ( $k_d/k_a$ ).

|      | $k_a$                        | $k_d$                     | $K_D$      |
|------|------------------------------|---------------------------|------------|
|      | $M^{-1}s^{-1} (\times 10^6)$ | $s^{-1} (\times 10^{-2})$ | $nM$       |
| WT   | $2.4 \pm 1.3$                | $4.4 \pm 2.3$             | 18.5       |
| L11Q | $3.2 \pm 0.8$                | $7.8 \pm 2.0$             | 24.5       |
| Y9F  | $2.0 \pm 0.7$                | $9.9 \pm 3.8$             | 49.5       |
| R15Q | $2.8 \pm 0.6$                | $10.4 \pm 2.4$            | 37.7       |
| W5F  | 0.13                         | 154                       | 12000      |
| W5K  | No binding                   | No binding                | No binding |

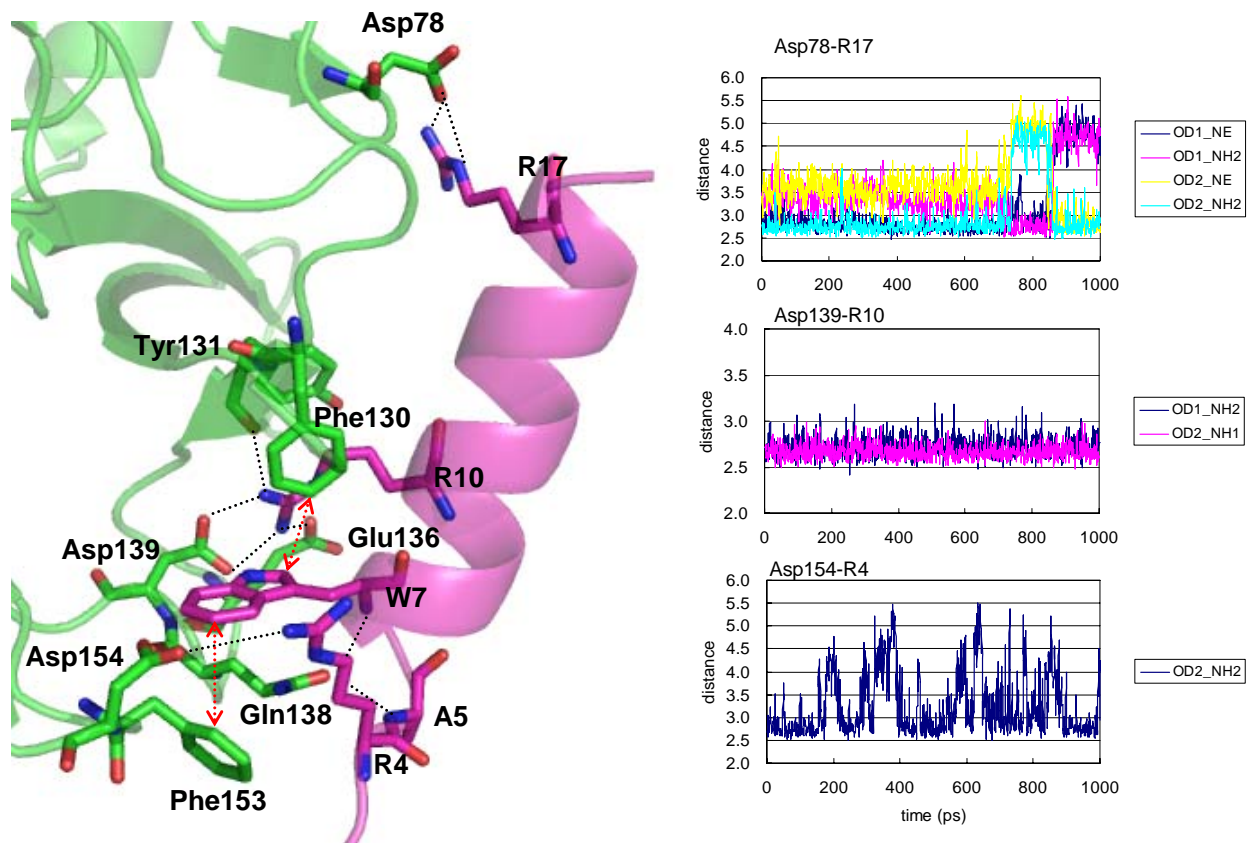

**Figure S1** Binding of LR2 ligand into the Mth ectodomain. The residues from the receptor are in three-letter code and those from the ligand are in single-letter code. The hydrogen bond and the aromatic interaction are specified with the dotted line and arrow, respectively. The distance profiles for three salt-bridge pairs are shown on the right.

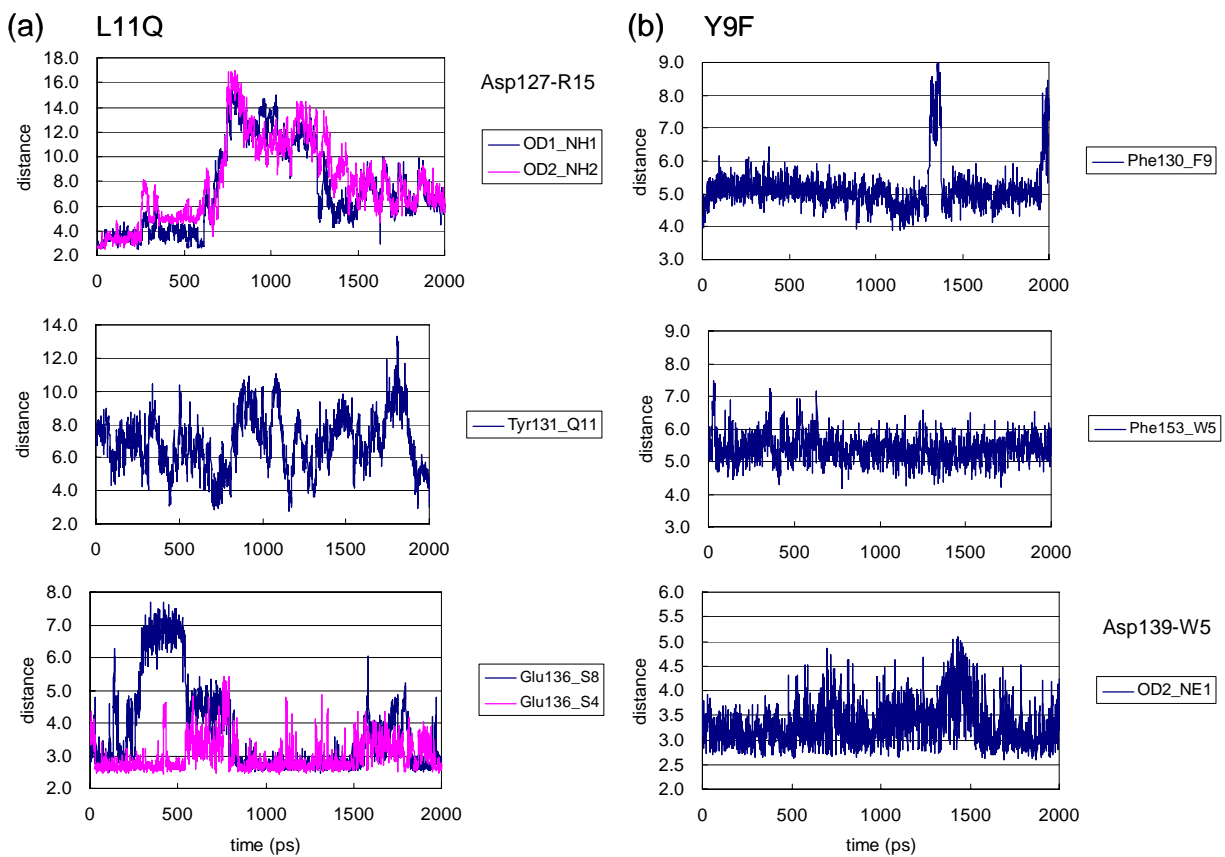

**Figure S2** Changes during 2 ns MD simulation of key intermolecular interactions in mutant complexes. Shown are distances (in Å) between sidechain heavy atoms. (a) L11Q, (b) Y9F, (c) W5K, (d) R15Q

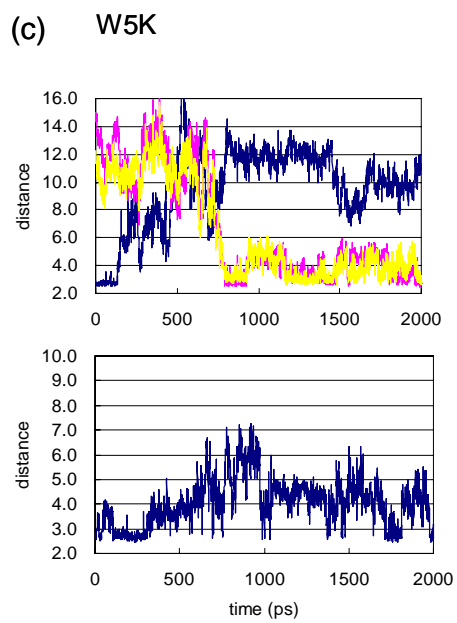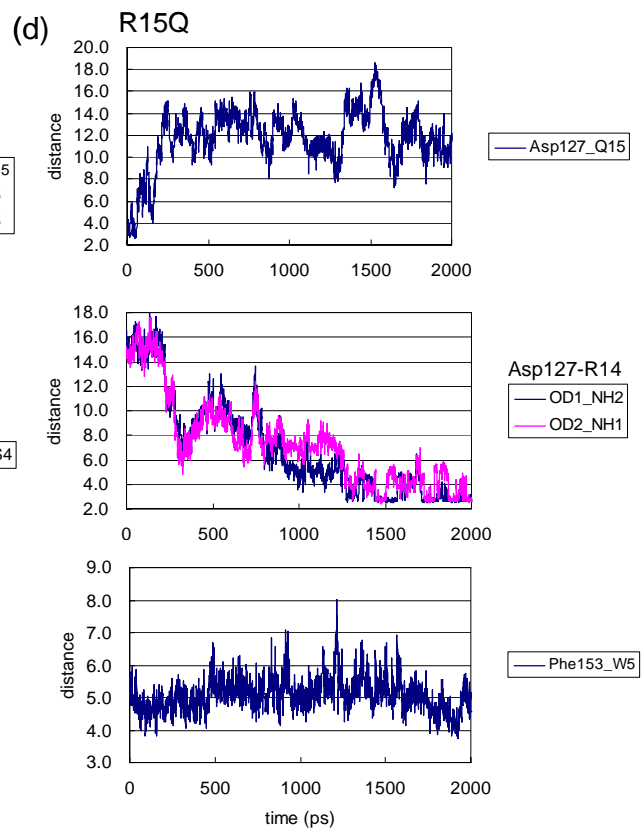

Figure S2 – continued

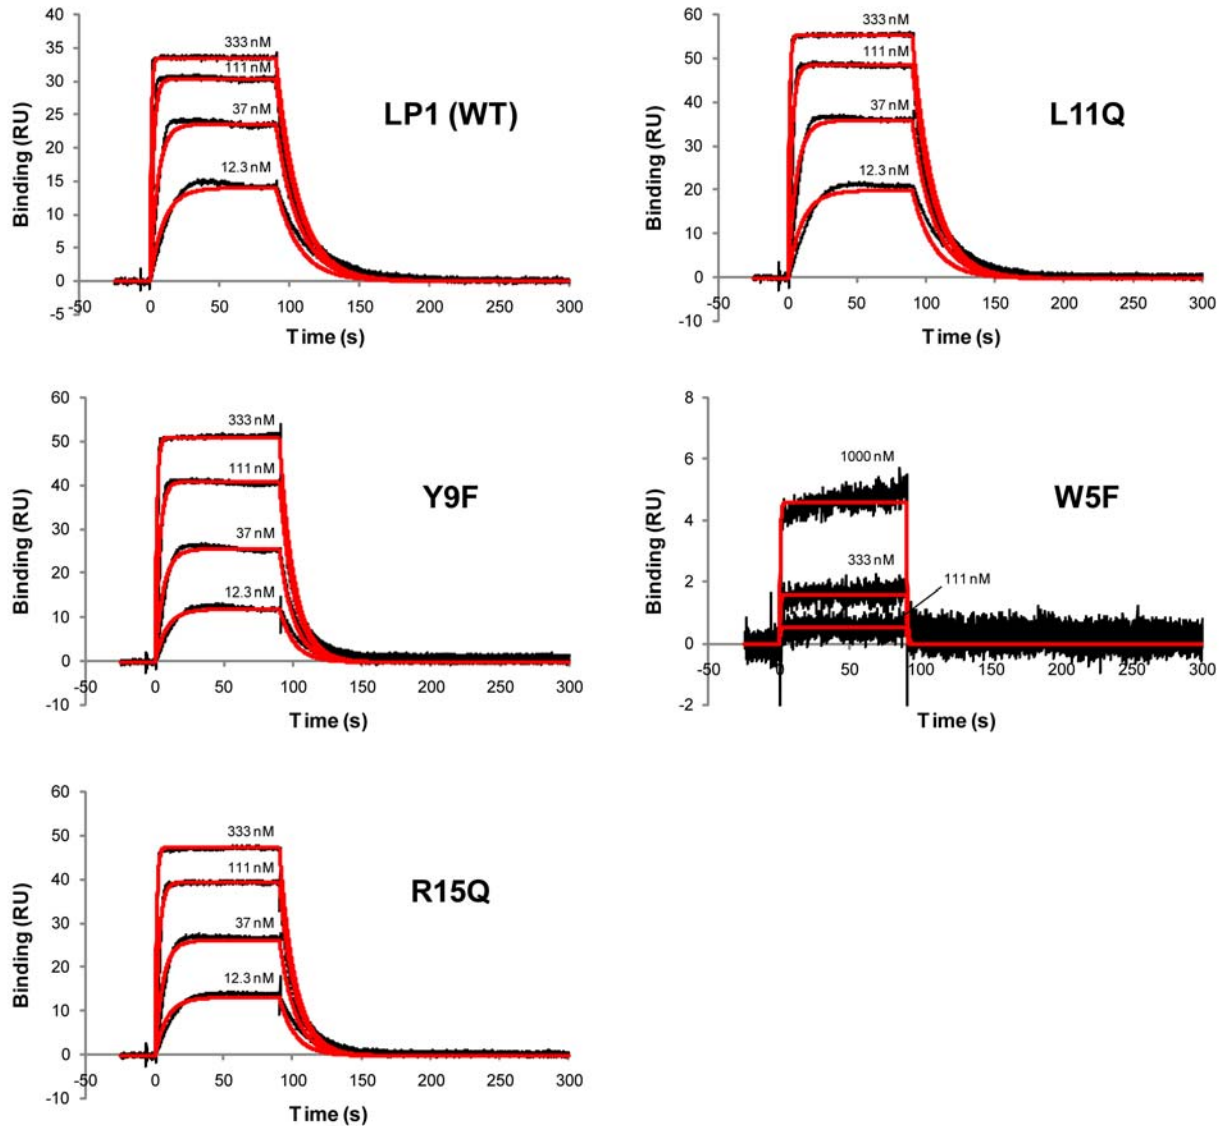

**Figure S3** Binding interactions of LP1 wild-type (WT) and mutant peptides with the Mth ectodomain. Surface plasmon resonance sensorgrams were generated by immobilizing the Mth ectodomain on the surface of a flow cell. A peptide concentration series of the indicated peptide was injected ( $150\ \mu\text{L}$  at  $0\ \text{s}$ , with a  $100\ \mu\text{L}/\text{min}$  flow rate) and binding response was measured in real-time as resonance units (RU). The global kinetic fits (red) are overlaid on the original sensorgrams (black). Duplicate injections of the  $111\ \text{nM}$  concentration for each peptide were performed and sensorgrams for both are overlaid. Sensorgrams have been double-referenced from response curves generated by a flow cell without Mth and averaged buffer blank injections. The derived kinetic parameters are shown in Table 2.
